## **Building a botanical foundation for perennial agriculture: Global inventory of wild, perennial herbaceous Fabaceae species**

Claudia Ciotir<sup>1,2</sup>, Wendy Applequist<sup>2</sup>, Timothy E. Crews<sup>3</sup>, Neculai Cristea<sup>4</sup>, Lee R. DeHaan<sup>3</sup>, Emma Frawley<sup>1</sup>, Sterling Herron<sup>1</sup>, Robert Magill<sup>2</sup>, James Miller<sup>2</sup>, Yury Roskov<sup>5</sup>, Brandon Schlautman<sup>3</sup>, James Solomon<sup>2</sup>, Andrew Townesmith<sup>2</sup>, David Van Tassel<sup>3</sup>, James Zarucchi<sup>2</sup>, and \*Allison J. Miller<sup>1,2,6</sup>.

<sup>1</sup>Saint Louis University, Department of Biology, 3507 Laclede Ave., St. Louis, MO 63110, USA; elenaclaudia.ciotir@slu.edu; sterling.herron@slu.edu; allison.j.miller@slu.edu; emma.frawley@slu.edu.

<sup>2</sup>The Missouri Botanical Garden, 4500 Shaw Blvd. St. Louis, MO 63110, USA; andrew.townesmith@mobot.org; bob.magill@mobot.org; jim.solomon@mobot.org; james.zarucchi@mobot.org; wendy.applequist@mobot.org; james.miller@mobot.org.

<sup>3</sup>The Land Institute, 2440 E. Water Well Rd., Salina, KS 67401, USA; crews@landinstitute.org; dehaan@landinstitute.org; schlautman@landinstitute.org; vantassel@landinstitute.org.

<sup>4</sup>IT Freelance, 4816 Dalhousie Dr. NW Calgary AB T3A 1B2, Canada; neculai.cristea@gmail.com.

<sup>5</sup>Illinois Natural History Survey Prairie Research Institute, 1816 South Oak Street (MC-652); Champaign, IL 61820-6960, USA; yroskov@illinois.edu.

<sup>6</sup>Danforth Plant Science Center, 975 North Warson Road, St. Louis, MO, 63132.

\*Author for correspondence: allison.j.miller@slu.edu.

This manuscript has been submitted as a research paper to the journal *Plants, People, Planet* (<http://plantspeopleplanet.org>). Submission link:

[https://mc.manuscriptcentral.com/LongRequest/plantspeopleplanet?DOWNLOAD=TRUE&PARAMS=xik\\_43uLt4981kk4sHn4KMiVBxwgd8fgiACpxhS184KBDgnxiYxsh5sKb6UZWAAW8oYJ8Q793uofkCwgMMuyTYEQFQeUJDynft27YBPwhkT8kRkcJug71bY89N9FtiPWRwLDyqZ5tNb8ddAJRwhgJ447q6cdqZnxEH59yW5PBQkRgssbwVJdLB2gyzp2F5qdJHCs7XykN](https://mc.manuscriptcentral.com/LongRequest/plantspeopleplanet?DOWNLOAD=TRUE&PARAMS=xik_43uLt4981kk4sHn4KMiVBxwgd8fgiACpxhS184KBDgnxiYxsh5sKb6UZWAAW8oYJ8Q793uofkCwgMMuyTYEQFQeUJDynft27YBPwhkT8kRkcJug71bY89N9FtiPWRwLDyqZ5tNb8ddAJRwhgJ447q6cdqZnxEH59yW5PBQkRgssbwVJdLB2gyzp2F5qdJHCs7XykN)

## 1 **Summary**

- 2 ● Concerns about soil health and stability are focusing attention on crops that deliver both  
3 agricultural products and ecological services. Deep rooted, perennial plants that build soil  
4 organic matter, support diverse below-ground microbial communities, and produce edible  
5 seeds are key components underpinning ecological intensification; however few  
6 perennial, herbaceous crops have been domesticated for food.
- 7 ● To facilitate development of edible, perennial, herbaceous crops, including perennial  
8 grains, we constructed an online resource of wild, perennial, herbaceous species - the  
9 Perennial Agriculture Project Global Inventory (PAPGI;  
10 <http://www.tropicos.org/Project/PAPGI>). The first component of this project focuses on  
11 wild, perennial, herbaceous Fabaceae species. We extracted taxonomic names and  
12 descriptors from the International Legume Database and Information Service. Names  
13 were added to PAPGI, a special project within the botanical database TROPICOS, where  
14 they link to specimen records and ethnobotanical and toxicological data. PAPGI includes  
15 6,644 perennial, herbaceous Fabaceae species. We built a searchable database of more  
16 than 60 agriculturally important traits. Here we highlight food and forage uses for 314  
17 legume species, and toxicological data for 278 species.
- 18 ● The novel contribution of PAPGI is its focus on wild, perennial herbaceous species that  
19 generally have not entered the domestication process but that hold promise for  
20 development as perennial food crops. By extracting botanical information relevant for  
21 agriculture we provide a dynamic resource for breeders and plant scientists working to  
22 advance ecological intensification of agriculture, and for conservation managers working  
23 to preserve wild species of potential agricultural importance.

24

## 25 **KEYWORDS**

26 Ecological intensification, ethnobotany, Fabaceae, perennial grains, perennial polyculture,  
27 sustainable agriculture, toxicology.

28

29

30

31

## 32 **Societal Impact Statement**

33  
34 Agroecosystems are constantly evolving to meet the needs of a growing population in a  
35 sustainable manner. Perennial, herbaceous crops deliver both agricultural products and  
36 ecological services. Until recently, edible, perennial, herbaceous crops, including perennial  
37 grains, were absent from agriculture. Perennial, herbaceous crops can be developed through wide  
38 hybridization between annual crops and perennial relatives or by de novo domestication of wild  
39 species. The diversity of wild, perennial, herbaceous legume species documented by the PAPGI  
40 increases resources available to breeders of perennial, herbaceous legumes, and raises awareness  
41 about previously untapped wild plant diversity in future crop development.

## 43 **Introduction**

44  
45 Agriculture is the world's largest and most rapidly expanding ecosystem and the leading cause of  
46 biodiversity loss (Millennium Ecosystem Assessment, 2005). Agricultural intensification,  
47 increased productivity per unit area, results in dramatic yield gains through breeding and  
48 agronomic inputs (Mann, 1997), but also leads to soil degradation and erosion (Cox et al., 2006;  
49 FAO, 2009; Pretty, Toulmin, & Williams, 2011). Ecological intensification or multi-functional  
50 agriculture, an approach which aims to maximize agricultural products while simultaneously  
51 providing ecological services, is a compelling concept framing conversations about sustainable  
52 food production (Cassman, 1999; FAO, 2009; Doré et al., 2011; Bommarco, Kleijn, & Potts,  
53 2013; Tittonell, 2014). Key components underpinning multi-functional agriculture are perennial,  
54 herbaceous crops; however, there are few perennial, herbaceous crops in large-scale production  
55 today.

56  
57 High-yielding, deep rooted, perennial, herbaceous plants prevent erosion, build soil organic  
58 matter, support diverse below-ground microbial communities, provide ecosystem services, and  
59 produce seeds and biomass that can be harvested mechanically (e.g. Glover et al., 2010; Pimentel  
60 et al., 2012; Crews et al., 2016; DeHaan et al., 2016; Crews & Cattani, 2018). There are various  
61 ways in which perennial crops can be incorporated into agricultural systems, including rotation  
62 with annuals, in perennial monocrops, or in perennial polycultures (Cattani, 2014; Ryan et al.,

63 2018). Although some perennial, herbaceous species are grown for biomass (e.g., alfalfa), here  
64 we turn our attention to perennial herbs grown for their edible reproductive structures, and focus  
65 in part on perennial grains (dry edible seeds harvested from perennial cereal, legume, oilseed,  
66 and pseudocereal crops; Van Tassel & DeHaan, 2013).

67  
68 Despite their potential utility, wild, perennial, herbaceous species were rarely domesticated for  
69 seed or fruit production (DeHaan, Van Tassel, & Cox, 2005; Van Tassel, DeHaan, & Cox, 2010;  
70 Table S1). Several hypotheses have been proposed to explain the lack of perennial, herbaceous  
71 crops including trade-offs among vegetative and reproductive tissues and contingency effects of  
72 early agriculture which focused on annuals, among others (Van Tassel, DeHaan, & Cox, 2010).  
73 Today, perennial herbaceous crops are being developed through “wide hybridization,” where  
74 existing annual crops are crossed with perennial relatives, and *de novo* domestication of wild,  
75 perennial, herbaceous species (DeHaan & Van Tassel, 2014). Efforts to develop perennial grains  
76 are underway in several crop systems (Table 1); however, to our knowledge, there are few  
77 existing resources that provide information on wild, perennial, herbaceous plant biodiversity for  
78 the purposes of agricultural innovation.

79  
80 The Missouri Botanical Garden (St. Louis, MO) is an exemplary leader in the field of plant  
81 biodiversity data and established the world’s first botanical database “Tropicos”  
82 ([www.tropicos.org](http://www.tropicos.org)) to manage plant specimens and facilitate herbarium label production.  
83 Tropicos is unique because it is based on taxonomic names that link to herbarium specimens and  
84 other information, including other biodiversity information portals (Table S3). Here we report on  
85 the development of a special project within Tropicos, the Perennial Agriculture Project Global  
86 Inventory (PAPGI; <http://www.tropicos.org/Project/PAPGI>).

87  
88 PAPGI represents a collaborative effort among botanists, evolutionary biologists, and breeders to  
89 inventory wild, perennial, herbaceous species and to provide relevant information needed to  
90 assess potential utility of previously undomesticated perennial species (Figure 1). This inventory  
91 is designed to answer fundamental questions such as: How many perennial, herbaceous species  
92 exist in agriculturally important plant families? Where are perennial, herbaceous species  
93 distributed geographically? What natural variation exists in agriculturally relevant plant traits?

94 Have perennial herbaceous species been used for food in the past and do they have any known  
95 toxic properties? In this first phase, we focus on the Fabaceae family (legumes). The specific  
96 objectives of this manuscript are to: 1) describe PAPGI construction; 2) introduce the Fabaceae  
97 inventory in PAPGI; and 3) highlight ethnobotanical and toxicological data for wild, perennial,  
98 herbaceous legumes.

99

## 100 **Material and Methods**

101

102 **Acquisition of taxonomic, lifespan, and growth habit data.** The legume family includes an  
103 estimated 20,856 species (Smykal et al., 2018) of which more than 40 species in 25 genera have  
104 been domesticated for food, forage, and other uses (Smartt & Simmonds, 1995; Hammer &  
105 Khoshbakht, 2015; Table S2). To identify wild, perennial, herbaceous legume species, we  
106 extracted data from the International Legume Database and Information Service (ILDIS;  
107 [www.ildis.org](http://www.ildis.org)), a global cooperative database developed by 71 legume specialists (Bisby, 1993;  
108 Roskov et al., 2005; Roskov et al., 2017a). At the time of data extraction ILDIS included 19,939  
109 species in 732 genera with 5,118 infra-specific taxon names. In addition, ILDIS includes  
110 information on life form, growth habit, conservation status, economic use, geographic  
111 distribution, illustrations, and maps (Roskov et al., 2005; Roskov et al., 2017a). These data were  
112 not accessible through ILDIS or Catalogue of Life; we acquired them directly from ILDIS  
113 database manager Y. Roskov as eight separate comma-separated value (.csv) files (Table S4).

114

115 **ILDIS data query and filtering.** We used MySQL (Widenius et al., 2002) to query each of the  
116 eight .csv files and extracted information describing growth habit (herb, shrub, or tree), lifespan  
117 (annual or perennial), taxon name, and ILDIS IDs. ILDIS IDs are unique record numbers that  
118 correspond to species, subspecies, and varieties, and serve as the only link between trait  
119 information and taxonomy in the ILDIS data. We wrote custom scripts in Visual FoxPro Version  
120 9.0 (Microsoft, Redmond, Washington, USA) to match ILDIS IDs to their respective growth  
121 habit, lifespan, and taxonomic names (Appendix 1). From Visual FoxPro, we exported one single  
122 output file (.csv) for the ILDIS database assembly (Table S5; Figure S1; Figure S2). Not all  
123 ILDIS IDs in the database assembly file contained complete lifespan and growth habit trait data.  
124 When these data were missing, literature was consulted and gaps were filled manually (Figure

125 S1, Table S3). Further, ILDIS did not include information for biennials. ILDIS IDs that were  
126 missing both lifespan and growth habit information were removed from the database assembly  
127 file.

128

129 We used Microsoft Excel to filter the data. First, we discarded taxa listed as trees, trees/shrubs,  
130 and obligate shrubs. Second, we discarded annual herbs. Third, we removed intraspecific taxa  
131 (e.g., subspecies and varieties). Ultimately, we retained only ILDIS IDs for perennial,  
132 herbaceous species that grow as annuals in some environments, and perennial herbs that become  
133 shrubby in some environments.

134

135 **Matching ILDIS species names in Tropicos database.** To match species names extracted from  
136 ILDIS to species names in Tropicos (Figure S1), first we matched species names regardless of  
137 differences in authority and automatically selected the accepted name and authority when  
138 available. From Tropicos, we obtained a file that contained unique Tropicos IDs (species names  
139 in Tropicos) for each ILDIS species name. Trait data for species names were imported into  
140 Tropicos using their corresponding Tropicos ID, and subsequently linked automatically to  
141 taxonomic information, specimen information, references, photos, and distribution maps for that  
142 name in Tropicos. A number of species names present in ILDIS were missing in Tropicos. We  
143 verified ILDIS names in the International Plant Names Index (IPNI, 2012) and manually entered  
144 them in Tropicos. Species names present in ILDIS but absent from IPNI were not recorded in  
145 Tropicos and were removed from the database assembly file.

146

147 **Establishment of PAPGI interface.** Legume data extracted from ILDIS and imported into  
148 Tropicos were organized into a special project within Tropicos, the Perennial Agriculture Project  
149 Global Inventory (PAPGI; <http://www.tropicos.org/Project/PAPGI>). PAPGI has a user-friendly  
150 layout that includes a vertical navigation bar that links to PAPGI-specific information (project  
151 introduction, family descriptions, and a customized search builder). An important feature within  
152 PAPGI is the search builder, a custom query based on 63 traits organized into seven broad  
153 categories: 1) taxonomy, 2) growth descriptors, 3) ecology, 4) reproductive biology, 5) genetics,  
154 6) economic use, and 7) toxicity (Table 2). Descriptors were developed with input from breeders  
155 at The Land Institute, who identified traits used when selecting perennial, herbaceous species for

156 pre-breeding programs. PAPGI includes a drop-down menu for each descriptor. For example,  
157 under “reproductive biology” > “sexual reproduction,” users can select “selfing” and run the  
158 search engine. Upon completion, this search will pull up all taxa in the database that are known  
159 to self-fertilize. It is possible to search for any combination of descriptors in the database;  
160 however it is important to note that data acquisition and entry is ongoing.

161  
162  
163 **Ethnobotanical data integration within PAPGI.** Ethnobotanical data were compiled from  
164 ILDIS, other databases, and literature (Table S6; National Research Council, 1979; Smartt,  
165 1990). We assembled an ethnobotanical dataset for our list of wild, perennial, herbaceous  
166 Fabaceae species. We documented plant parts used for human consumption (flowers, leaves,  
167 pods, and seeds), food type description, as well as names and localities of indigenous tribes using  
168 them. Similarly, we recorded if a species was used for forage, fodder, silage, and any other  
169 economic applications, such as bioenergy, fiber, gums/resins, honey production, latex/rubber,  
170 medicinal/psychoactive properties, wax, and cultural or religious purposes (Table 2).

171  
172 **Toxicological data integration within PAPGI.** Many plants are inedible to humans without  
173 some form of processing; consequently, information about plant toxicity and detoxification  
174 methods is important when considering wild taxa for pre-breeding. We entered toxic properties  
175 into PAPGI, such as the toxic part(s) of the plant and the nature of the toxicity report (i.e.  
176 observed in the lab, field, in animals or in humans; Table 2, Table S7).

177  
178 The definition of “toxicity” is not straightforward and sometimes depends upon value judgment.  
179 For each species, we categorized reported toxicity as either toxic to humans, toxic to animals, or  
180 predicted as toxic. Edible plants for which there are occasional, idiosyncratic reports of negative  
181 reactions were generally not coded as toxic to humans, while well-defined and relatively  
182 common human illnesses associated with edible plants (e.g., favism) were flagged as “Toxicity -  
183 human.” “Toxicity - animal” was used for reports of illness in livestock, including in controlled  
184 feeding studies or if an animal voluntarily consumed the plant. “Toxicity - lab animal” described  
185 species reported as toxic in studies in which small animals in confinement were overfed  
186 quantities of a plant or plant extract, since results of such studies are not always relevant to  
187 normal exposure. “Toxicity - predicted” was used to flag species without reports of illness, but



188 that had been reported in survey studies to contain chemicals similar to other toxic species (in  
189 particular, Davis, 1982; Williams & Gómez-Sosa, 1986; Wink, Meisner, & Witte, 1995;  
190 Fletcher, Al Jassim, & Cawdell-Smith, 2015). Generally, we observed that species whose  
191 chemistry and bioactivity are understudied should similarly be suspected of toxicity when  
192 toxicity is common within the same genus. We have noted these observations on the PAPGI-  
193 specific webpages of several genera; however, comments are not exhaustive, and species with  
194 unknown toxicity should be investigated further (Table S7).

195

## 196 **Results**

197

198 **PAPGI database construction - Summary of extracted data from ILDIS.** The ILDIS database  
199 reported 26,394 Fabaceae ILDIS IDs (species and infraspecific taxa) and 19,939 species names  
200 (Roskov et al., 2005). In this study we recovered slightly fewer taxon names from ILDIS (25,005  
201 taxon names, 19,904 species); we believe the discrepancy was the result of edits made to the  
202 ILDIS database after its 2005 publication. Of these, 5,370 taxon names (3,974 species names)  
203 had incomplete or missing lifespan and growth habit trait data. We completed partially missing  
204 lifespan and growth traits for 59 taxon names and the remaining 5,311 taxon names (3,942  
205 species) were not included in PAPGI. The significance of missing data for our database is minor  
206 as many missing species belong to woody genera (e.g. *Acacia*, *Caesalpinia*, *Mimosa* etc.) or  
207 genera with large number of species (e.g. *Astragalus*) where detailed taxonomic assessments are  
208 ongoing. Thus, of the 25,005 taxon names extracted, 19,694 taxon names (15,963 species names,  
209 80.19% of the total in ILDIS) have complete trait data for lifespan and growth habits (Table 3).  
210 Of the 19,694 taxon names with trait data, 18,018 taxon names (14,645 species names) are  
211 perennial or perennial/annual, and 1,674 taxon names (1,317 species names) are annual (Table  
212 3). One herbaceous taxon was determined to be biennial. 91.74% (14,645 of 15,963) of wild  
213 legume species examined for this study are perennial (Table 3 and Figure 2). Of these, 6,644 are  
214 primarily perennial and herbaceous. The remaining 2,904 tree taxa (2,439 species names), 1,619  
215 shrub/tree taxa (1,300 species names), and 5,222 shrubby taxa (4,230 species names) were  
216 neither perennial nor herbaceous and were not included in PAPGI (Table 3).

217

218 **PAPGI database construction - Matching ILDIS species names in Tropicos database**



219 Of the 6,644 wild, primarily perennial herbaceous species names in ILDIS, we matched 6,427 to  
220 existing Tropicos records. 217 ILDIS species names were missing from Tropicos. Of these, 142  
221 were retrieved in IPNI and recorded in Tropicos (see methods), the remaining names were not  
222 entered in Tropicos. In total, 6,569 perennial, herbaceous species (or herbaceous and shrubby, or  
223 annual/perennial herbaceous) derived from ILDIS were included in PAPGI. One caveat is that  
224 the ILDIS database represents approximately 95% of the living legume species in the world  
225 (Roskov pers. comm.), and species names are continually being added onto the database  
226 checklist as they are discovered (Roskov et al., 2017 a, b; Smýkal et al., 2018).

227

228 **Agriculturally important trait data within PAPGI.** PAPGI functions as an interface for the  
229 integration of agriculturally and ecologically important trait data (Table 2). This framework  
230 includes over 60 traits with drop-down selection options for each of the traits of interest. While  
231 trait information has been completed for some taxa (e.g., *Lupinus* spp.), most require additional  
232 data entry.

233

234 **Ethnobotanical data for perennial, herbaceous Fabaceae.** At present, PAPGI includes  
235 ethnobotanical data for 314 wild, perennial, herbaceous legume species, and 91 of these have  
236 economic uses other than food, including fiber and medicinal properties (Table S6). As human  
237 populations have become increasingly urbanized, human collection of edible plants from the  
238 wild has decreased drastically (Hunter, 2007). Therefore, some of the recorded uses should be  
239 regarded as historical.

240

241 PAPGI includes genera with both agriculturally important annual crops and perennial herbaceous  
242 species, including: *Arachis* (52 perennial species), *Cajanus* (11), *Cicer* (35), *Glycine* (26),  
243 *Lathyrus* (83), *Lupinus* (113), *Medicago* (40), *Phaseolus* (15) *Psophocarpus* (9), *Trifolium* (95),  
244 *Vavilovia formosa* (a wild relative of *Pisum sativum*), *Vicia* (79), and *Vigna* (50) (Table S2).

245 Wild, herbaceous, perennial crop relatives include the perennial soybean species *Glycine*  
246 *tomentella* and *G. tabacina* consumed by aboriginal populations in Australia and in the  
247 Philippines. The perennial chickpea species *Cicer microphyllum* and *C. songharicum* are  
248 consumed by native peoples of middle Asia and the Himalayas. Also, six perennial *Phaseolus*  
249 species were consumed by Native Americans including *P. coccineus*, *P. lunatus*, *P. maculatus*,

250 *P. polystachios*, as well as *P. filiformis*, and *P. ritensis* in the Sonoran desert (Table S6 and  
251 references within).

252  
253 In addition to wild, perennial, herbaceous relatives of domesticated Fabaceae there are many  
254 other legume species that have been used by humans for various purposes, but that are not  
255 closely related to major crops (Table S6 and references within). For example, 16 perennial  
256 grasspea (*Lathyrus*) species are consumed by Native North American groups and African and  
257 Indian people. Seven perennial lupines (*Lupinus* spp.) are consumed by North and South  
258 American indigenous peoples. Eighteen perennial vetches (*Vicia* spp.) are consumed in North  
259 America, China, and Africa and are used as forage and fodder in multiple parts of the world.  
260 Sixteen perennial *Vigna* species are consumed primarily in South America and Africa. Other  
261 Fabaceae genera contain promising perennial species candidates that have been harvested for  
262 food and forage (Caradus & Williams, 1995), including *Apios* (4 perennial species), *Astragalus*  
263 (20) *Baptisia* (14), *Dalea* (87), *Desmanthus* (18), *Lespedeza* (27), *Lotus* (81), *Pediomelum* (7),  
264 and *Trigonella* (40).

265  
266 **Toxicological data for perennial, herbaceous Fabaceae species.** 238 legume species were  
267 identified as toxic in PAPGI (Table S7 and references within). These include 15 species with  
268 known human toxicity, 118 species with animal toxicity, 26 species with animal toxicity in lab  
269 studies, and 80 species with predicted toxicity based on reported information (Table S7).  
270 Categories of toxins are also reported for most genera or for individual species, e.g. neurotoxic  
271 nitro compounds in *Astragalus* spp., pyrrolizidine alkaloids in *Crotalaria* spp., and *Lupinus* spp.,  
272 anthraquinones in *Chamaecrista* spp. and *Senna* spp., cyanogenic glycosides in *Lotus* spp. etc.  
273 (Table S7). Seeds or fodder (forage bearing seeds) of 162 species were reported as toxic (Table  
274 S7). It should be noted that seeds of 17 species were coded as both “toxic” and “used as human  
275 food,” which may indicate loss of toxicity with appropriate processing or natural variation for  
276 toxicity. Six Fabaceae genera were also flagged as containing species with a high index of  
277 “suspicion for toxicity.” Although we present a summary of known toxicology information  
278 (Table S7), we recommend that for species with unknown toxicology information, users consult  
279 toxicity information recorded on the PAPGI genus page, because this information applies to all  
280 species within the genus. We predict that the number of legume species known to contain toxic

281 compounds will increase dramatically as this field is populated. Therefore, additional research  
282 into toxic compounds for specific candidates is recommended before selection for pre-breeding.

283

## 284 **Discussion**

285

286 The Perennial Agriculture Project Global Inventory (PAPGI) bridges botanical diversity data and  
287 the plant breeding community, offering a taxonomically accurate and up-to-date inventory of  
288 wild, perennial, herbaceous legumes. This resource was designed to aid in the identification of  
289 perennial, herbaceous candidates for pre-breeding, domestication, and possible use in the  
290 ecological intensification of agriculture. Because PAPGI is embedded within Tropicos, it links  
291 directly to species names, collection records, locality data, and other botanical data. Further,  
292 PAPGI includes a searchable database of more than 60 agriculturally important traits, and  
293 incorporates taxon-specific information on ethnobotany and toxicology. Although many  
294 outstanding plant databases have been developed prior to the inception of this project, they  
295 catalogued either contemporary crops and their wild relatives, or wild plant diversity (Table S3).  
296 The novel contribution of PAPGI is its focus on wild, perennial, herbaceous species that  
297 generally have not entered the domestication process, that may or may not be related to existing  
298 crops, but that may hold promise for crop development.

299

300 **Cataloging wild plant biodiversity to support agricultural innovation.** Of the 15,963 legume  
301 species listed in ILDIS, 14,645 (91.74%) are perennial (Table 3 and Figure 2). This result is not  
302 surprising as many world ecosystems consist primarily of perennials (Zhang et al., 2011);  
303 however, domestication efforts have focused primarily on annual legumes, which in our study  
304 make up 8.25% of the family. Although many wild, perennial Fabaceae are woody (49.95%),  
305 there are 6,644 wild, perennial, herbaceous legume species (41.62% of the family). Previously,  
306 wild, perennial herbaceous legumes and their associated trait data (growth habit, economic uses  
307 and toxicological information) were not readily available nor easily searchable within ILDIS.  
308 PAPGI offers a tool for filtering and identifying wild, herbaceous, perennial species that might  
309 be good candidates for pre-breeding and domestication.

310

311 The PAPGI framework allows for queries that support both approaches to developing perennial,  
312 herbaceous crops: wide hybridization and *de novo* domestication (DeHaan et al., 2014). Breeders  
313 can use PAPGI to support wide hybridization by identifying perennial members of genera that  
314 contain annual crops. We queried 13 commercially produced herbaceous legume crops in PAPGI  
315 and found that these agriculturally important legume genera contain more perennial than annual  
316 species, and that many of their perennial species are edible or have forage uses (Tables S2 and  
317 S6). PAPGI can also be used to support *de novo* domestication. Although data entry is ongoing,  
318 PAPGI offers the opportunity to filter the 6,644 wild, perennial, herbaceous legumes through the  
319 selection of suites of traits. One way in which PAPGI might facilitate this initial selection  
320 process is to identify species that have been used by people (Table S6). Using data generated in  
321 PAPGI, we identified a “short-list” of 10 candidate genera with underutilized wild, perennial  
322 herbaceous/shrubby species used for food in temperate and tropical areas: *Apios* (4 perennial  
323 species), *Astragalus* (1,720), *Baptisia* (14), *Canavalia* (22), *Dalea* (86), *Macroptilium* (9),  
324 *Macrotyloma* (21), *Psophocarpus* (9), *Psoralea* (45), and *Tylosema* (4). These genera may be  
325 the focus of future analyses assessing in ground field traits and response to selection. Fabaceae  
326 results support previous predictions that wild, perennial, herbaceous species have the potential to  
327 expand agricultural diversity beyond current annual grain crops (Crews & Cattani, 2018).

328  
329 PAPGI can be used in concert with ongoing projects as well. For example, breeders in Australia  
330 identified wild perennial, herbaceous legume crop candidates adapted to dry and hot climates,  
331 such as the genus *Cullen* (Bennett et al., 2011). *Cullen* includes 16 perennial herbaceous/shrubby  
332 species with deep taproots and good seed yield (Bell et al., 2011; Bell et al., 2012). Additional  
333 information on these taxa is available within PAPGI. Further, Schlautman et al. (2018) identified  
334 43 temperate adapted perennial legume candidates with desirable pre-breeding traits, such as  
335 determinate growth, synchronous maturation, and non-shattering fruits. PAPGI expands upon  
336 this and includes perennial, herbaceous species of *Glycyrrhiza* (19 perennial, herbaceous  
337 species), *Onobrychis* (124), *Oxytropis* (472), *Senna* (21), and *Thermopsis* (25). Many perennial  
338 species of these genera have complete edibility and toxicity information in PAPGI (Tables S5  
339 and S6 and references within).

340

341 **Future directions to strengthen connections between botanical diversity and agriculture**  
342 **research.** PAPGI represents an important conceptual and practical advance in the cataloging of  
343 wild plant biodiversity to support agricultural innovation. This database expands plant genetic  
344 resources for agriculture to include wild, perennial, herbaceous species (Van Tassel, DeHaan, &  
345 Cox, 2010; Meyer, DuVal, & Jensen, 2012). Using the PAPGI model, perennial herbaceous  
346 species from other families with economic crops (such as Brassicaceae, Polygonaceae,  
347 Solanaceae etc.) or desirable agronomic or ecological traits could be documented, thus enhancing  
348 the role of botanical sciences in describing diversity and delivering valuable perennial crop  
349 candidates.

350  
351 A major challenge for PAPGI is the compilation and integration of detailed information on  
352 agriculturally important traits, such as breeding systems, genetics, and morphology. These data  
353 are often available from disparate sources in the literature and other databases. We developed a  
354 framework for data integration within PAPGI; however, efforts to place these valuable data into  
355 PAPGI consist primarily of manual entry. Important next steps include automated efforts to add  
356 data on agriculturally important traits (e.g. Endara, Cui, & Burleigh, 2018), and also to develop a  
357 system in which researchers around the world can contribute their data. Another long-term  
358 objective is to facilitate the acquisition of seeds or clones of species in the PAPGI database.  
359 Alternative cropping systems, such as perennial polycultures, require careful reconsideration of  
360 the conservation of Plant Genetic Resources for Agriculture (PGRFA) (Jackson & Ford-Lloyd,  
361 1990; FAO, 2009; Heywood, 2011). Wild, perennial, herbaceous species of the Fabaceae and  
362 other families represent one possible expansion of the concept of PGRFA, with an eye towards  
363 wild plant biodiversity that might be useful in the ecological intensification of agriculture.  
364 PAPGI connects major botanical resources (e.g., Missouri Botanical Garden) with plant breeders  
365 (The Land Institute), thereby offering an important model for future efforts aimed at diversifying  
366 species used in agriculture.

367  
368 In conclusion, the vast plant diversity in nature and in cultivation has been catalogued in various  
369 ways by different academic and research communities (Table S3). Although botanists,  
370 agronomists, ethnobotanists, ecologists, and farmers have complementary interests, the data  
371 being collected are not always available in a form that is easily accessible to all of the various

372 research groups interested in plant diversity and agriculture. PAPGI attempts to connect  
373 taxonomic and agronomic databases to identify wild, previously undomesticated taxa for  
374 inclusion in breeding programs. A major challenge moving forward is the efficient extraction of  
375 data on plant form, function, and use from disparate, diverse sources including journal articles,  
376 books, and even herbarium specimens. Harvesting these valuable data, and integrating them in an  
377 efficient way into searchable, web-accessible databases like PAPGI, is a major hurdle that  
378 requires creative approaches and cutting-edge technologies.

379  
380

### 381 **Acknowledgements**

382 This work was funded by the Perennial Agriculture Project in conjunction with the Malone  
383 Family Land Preservation Foundation and The Land Institute and by Saint Louis University. We  
384 acknowledge the help of many research assistants at The Missouri Botanical Garden including  
385 Tammy Charon, Mary McNamara, Lauren Peters, and Amy Pool, and librarians including  
386 Stephanie Keil, Linda Oestry, and Mary Stiffler. We are grateful to David Bogler and Mike  
387 Vincent for fruitful discussion on legume databases and legumes of North America. Guidance on  
388 Tropicos functionality and PAPGI database design was provided by Peter Jorgensen, John  
389 Pruski, Jan Salick, Peter Stevens, and Carmen Ulloa. Useful advice for data extraction, and  
390 advanced search tools in Tropicos was generously offered by Zachary Rogers. A special  
391 acknowledgement goes to Missouri Botanical Garden programmer Heather Stimmel who entered  
392 PAPGI records and executed queries for data integration in Tropicos. Saint Louis University  
393 undergraduate students Aidan Leckie-Harre, Brooke Micke, Colton Nettleton, Paige Pearson,  
394 Samantha Selby, and Olivia Weigl contributed to data entry. National Science Foundation  
395 Research Experiences for Undergraduates participants at the Missouri Botanical Garden who  
396 assisted with data entry and concept refinement included Emma Bergh, Dahlia Martinez, Marissa  
397 Sandoval, and Summer Sherrod.

398

### 399 **Author Contribution**

400 A.J.M., W.A., J.M. and T.E.C. conceived the work. C.C., and A.J.M. developed of the  
401 manuscript with conceptual advice from W.A., T.E.C., L.R.D, D.V.T., B.S and J.M. Y.R.

402 generated the ILDIS data and provided taxonomy, nomenclature and data extraction guidance.  
403 R.M. designed the PAPGI database layout in Tropicos. N.C. queried and extracted ILDIS data,  
404 generated the output file, and wrote the scripting steps in the Appendix 1. A.T. and W.A.  
405 recorded ethnobotanical and toxicological data in PAPGI and wrote the corresponding methods  
406 and results in the manuscript. E.F., and S.A.H., reviewed literature, edited figures, tables, and the  
407 manuscript. R.M. implemented the PAPGI framework in Tropicos. J.Z. curated the taxonomy  
408 and nomenclature of new legume species in Tropicos. J.S. assisted with entering new species in  
409 Tropicos, and edited existing synonymy records. All authors read, edited, and reviewed the  
410 manuscript, discussed the presented ideas and approved the final manuscript.

411

412 **Conflicts of Interest** The authors declare no conflict of interest.

413

414

## 415 **References**

416

417 Bell, L.W., Bennett, R.G., Ryan, M.H., & Clarke, H. (2011). The potential of herbaceous native  
418 Australian legumes as grain crops: a review. *Renewable Agriculture and Food Systems*, 26 (1),  
419 72-91. <https://doi:10.1017/s1742170510000347>.

420

421 Bell, L.W., Ryan, M.H., Bennett, R.G., Collins, M.T., & Clarke, H.J. (2012). Growth, yield and  
422 seed composition of native Australian legumes with potential as grain crops. *Journal Of The*  
423 *Science Of Food And Agriculture*, 92 (7), 1354-1361. <https://doi:10.1002/jsfa.4706>.

424

425 Bennett, R.G., Ryan, M.H., Colmer, T.D., & Real, D. (2011). Prioritisation of novel pasture  
426 species for use in water-limited agriculture: a case study of *Cullen* in the Western Australian  
427 wheatbelt. *Genetic Resources and Crop Evolution*, 58 (1), 83-100. [https://doi:10.1007/s10722-](https://doi:10.1007/s10722-010-9567-3)  
428 010-9567-3.

429

430 Bingham, E., Haas, T., Irwin, J., Mackie, J., Musial, J., Armour, D., Scotti, C., Arcioni, S.,  
431 Jimenez, C., & Mauriera, I. (2005). Alfalfa says hello to the genome of *Medicago arborea*.



- 432 Reports by Bingham and by Haas in: *Medicago Genetic Reports*, 5. Available at [www.medicago-](http://www.medicago-reports.org)  
433 [reports.org](http://www.medicago-reports.org).  
434
- 435 Bisby, F.A. (1993). Species Diversity Knowledge Systems: The ILDIS Prototype for legumes.  
436 *Annals of New York Academy of Sciences*, 700 (1), 159-164.  
437 <https://nyaspubs.onlinelibrary.wiley.com/doi/abs/10.1111/j.1749-6632.1993.tb26316.x>  
438
- 439 Bommarco, R., Kleijn, D., & Potts, S.G. (2013). Review: Ecological intensification: harnessing  
440 ecosystem services for food security. *Trends in Ecology & Evolution*, 28 (4), 230-238.  
441 <https://doi:10.1016/j.tree.2012.10.012>.  
442
- 443 Caradus, J.R., & Williams, W.M. (1995). Other temperate forage legumes (p.332-343). In: J.  
444 Smartt, & N.W. Simmonds (Eds.), *Evolution of Crop Plants*, 2nd Edition. Singapore: Longman  
445 Publishers.  
446
- 447 Cassman, K.G. (1999). Ecological intensification of cereal production systems: Yield potential,  
448 soil quality, and precision agriculture. *Proceedings National Academy of Sciences*, 96 (11),  
449 5952-5959. <https://doi.org/10.1073/pnas.96.11.5952>.  
450
- 451 Cattani, D.J. (2014). Perennial polycultures: How do we assembly a truly sustainable agricultural  
452 system? In *Perennial Crops for Food Security Proceedings of the FAO Expert Workshop*. Rome,  
453 Italy.  
454
- 455 Chen, Q.-F., Huang, X.-Y., Li, H.-Y., Yang, L.-J., & Cui, Y.-S. (2018). Recent Progress in  
456 Perennial Buckwheat Development. *Sustainability*, 10 (2), 536-553.  
457 <https://doi:10.3390/su10020536>.  
458
- 459 Cox, T.S., Glover, J.G., Van Tassel, D.L., Cox, C.M., & DeHaan, L.R. (2006). Prospects for  
460 developing perennial grain crops. *Bioscience* 56, 649-659. [https://doi.org/10.1641/0006-](https://doi.org/10.1641/0006-3568(2006)56[649:PFDPGC]2.0.CO;2)  
461 [3568\(2006\)56\[649:PFDPGC\]2.0.CO;2](https://doi.org/10.1641/0006-3568(2006)56[649:PFDPGC]2.0.CO;2).  
462

- 463 Cox, S., Nabukalu, P., Paterson, A. Kong, W., & Nakasagga, S. (2018). *Development of*  
464 *Perennial Grain Sorghum. Sustainability*, 10 (1), 172-180. <https://doi.org/10.3390/su10010172>.  
465
- 466 Crews, T.E., Blesh, J., Culman, S.W., Hayes, R.C., Jensen, E.S., Mack, M.C., Peoples, M.B., &  
467 Schipanski, M.E. (2016). Going where no grains have gone before: From early to mid-  
468 succession. *Agriculture Ecosystems & Environment*, 223, 223-238.  
469 <https://doi.org/10.1016/j.agee.2016.03.012>.  
470
- 471 Crews, T.E. & Cattani, D.J. (2018). Strategies, Advances, and Challenges in Breeding Perennial  
472 Grain Crops. *Sustainability*, 10 (7), 2192-2199. <https://doi:10.3390/su10072192>.  
473
- 474 Davis, A.M. (1982). The occurrence of anagryne in a collection of western American lupines.  
475 *Journal of Range Management*, 35, 81–84.  
476
- 477 DeHaan, L.R., Van Tassel, D.L. & Cox, T.S. (2005). Perennial grain crops: A synthesis of  
478 ecology and plant breeding. *Renewable Agriculture and Food Systems*, 20 (1), 5-14. [https://doi:](https://doi:10.1079/RAF200496)  
479 [10.1079/RAF200496](https://doi:10.1079/RAF200496).  
480
- 481 DeHaan, L.R., & Van Tassel, D.L. (2014). Useful insights from evolutionary biology for  
482 developing perennial grain crops. *American Journal of Botany*, 101 (10), 1801-1819. [https://doi:](https://doi:10.3732/ajb.1400084)  
483 [10.3732/ajb.1400084](https://doi:10.3732/ajb.1400084).  
484
- 485 DeHaan, L.R., Van Tassel, D.L., Anderson, J.A., Asselin, S.R., Barnes, R., Baute, G.J., Cattani,  
486 D.J., Culman, S.W., Dorn, K.M., Hulke, B.S., Kantar, M., Larson, S., Marks, M.D., Miller, A.J.,  
487 Poland, J., Ravetta, D.A., Rude, E., Ryan, M.R., Wyse, D., & Zhang, X.F. (2016). A Pipeline  
488 Strategy for Grain Crop Domestication. *Crop Science*, 56 (3), 917-930. [https://doi:](https://doi:10.2135/cropsci2015.06.0356)  
489 [10.2135/cropsci2015.06.0356](https://doi:10.2135/cropsci2015.06.0356).  
490
- 491 DeHaan, L., Christians, M., Crain, J., & Poland, J. (2018). Development and evolution of an  
492 intermediate wheatgrass domestication program. *Sustainability*, 10 (5), 1499- 1518.  
493 <https://doi.org/10.3390/su10051499>.

494  
495 Doré, T., Makowski, D., Malézieux, E., Munier-Jolain, N., Tchamitchian, M., & Tittone, P.  
496 (2011). Facing up to the paradigm of ecological intensification in agronomy: Revisiting methods,  
497 concepts and knowledge. *European Journal of Agronomy*, 34, 197–210.  
498 <https://doi.org/10.1016/j.eja.2011.02.006>.  
499  
500 Endara, L., Cui, H., & Burleigh, J.G. (2018). Extraction of phenotypic traits from taxonomic  
501 descriptions for the tree of life using natural language processing. *Applications in Plant Sciences*,  
502 6(3), e1035. <https://doi.org/10.1002/aps3.1035>.  
503  
504 Fletcher, M.T., Al Jassim, R.A.M., & Cawdell-Smith, A.J. (2015). The occurrence and toxicity  
505 of indospicine to grazing animals. *Agriculture*, 5 (3), 427–440.  
506 <https://doi.org/10.3390/agriculture5030427>.  
507  
508 Food and Agriculture Organization of the United Nations (FAO) (2009). A Global Treaty for  
509 Food Security and Sustainable Agriculture, International Treaty on plant genetic resources for  
510 food and agriculture. FAO, Rome: Electronic Publishing Policy and Support Branch  
511 Communication Division.  
512  
513 Glover, J.D., Reganold, J.P., Bell, L.W., Borevitz, J., Brummer, E.C., Buckler, E.S., Cox, C.M.,  
514 Cox, T.S., Crews, T.E., Culman, S.W., DeHaan, L.R., Erickson, D., Gill, B.S., Holland, J., Hu  
515 F., Hulke, B.S., Ibrahim, A.M.H., Jackson, W., Jones, S.S., Murray, S.C., Paterson, A.H.,  
516 Ploschuk, E., Sacks, E.J., Snapp, S., Tao, D., Van Tassel, D.L., Wade, L.J., Wyse, D.L., & Xu Y.  
517 (2010). Increased Food and Ecosystem Security via Perennial Grains, *Science* 328, 1638 – 1639.  
518  
519 Hammer, K., & Khoshbakht, K. (2015). A domestication assessment of the big five plant  
520 families. *Genetic Resources and Crop Evolution*, 62 (5), 665-689.  
521 <https://doi.org/10.1007/s10722-014-0186-2>.  
522  
523 Hayes, R.C., Wang, S., Newell, M.T., Turner, K., Larsen, J., Gazza, L., Anderson, J.A., Bell,  
524 L.W., Cattani, D.J., Frels, K., Galassi, E., Morgounov, A.I., Revell, C.K., Thapa, D.B., Sacks,

525 E.J., Sameri, M., Wade, L.J., Westerbergh, A., Shamanin, V., Amanov, A., & Li, G.D. (2018).  
526 The performance of early-generation perennial winter cereals at 21 sites across four continents.  
527 *Sustainability*, 10 (4), 1124-1152. <https://doi.org/10.3390/su10041124>.  
528  
529 Heywood, V.H. (2011). Introduction of Crop Wild Relatives (CWR) (p. 1-28). In: D. Hunter, &  
530 V.H. Heywood (Eds.), *Crop Wild Relatives: A Manual of in situ Conservation*. London:  
531 Earthscan and Bioversity International. Available at:  
532 [https://www.bioversityinternational.org/fileadmin/user\\_upload/online\\_library/publications/pdfs/](https://www.bioversityinternational.org/fileadmin/user_upload/online_library/publications/pdfs/Crop_wild_relatives/1.Introductory_background.pdf)  
533 [Crop\\_wild\\_relatives/1.Introductory\\_background.pdf](https://www.bioversityinternational.org/fileadmin/user_upload/online_library/publications/pdfs/Crop_wild_relatives/1.Introductory_background.pdf).  
534  
535 Huang, G., Qin, S., Zhang, S., Cai, X., Wu, S., Dao, J., Zhang, J., Huang, L., Harnpichitvitaya,  
536 D., Wade, L., & Hu, F. (2018). Performance, economics and potential impact of perennial rice  
537 PR23 relative to annual rice cultivars at multiple locations in Yunnan Province of China.  
538 *Sustainability*, 10 (4), 1086-1104. <https://doi.org/10.3390/su10041086>.  
539  
540 Hunter, P. (2007). The human impact on biological diversity. How species adapt to urban  
541 challenges sheds light on evolution and provides clues about conservation. *Analysis Science and*  
542 *Society. European Molecular Biology Organization (EMBO) Reports*, 8 (4), 316-318. [https://doi:](https://doi.org/10.1038/sj.embor.7400951)  
543 [10.1038/sj.embor.7400951](https://doi.org/10.1038/sj.embor.7400951).  
544  
545 The International Plant Names Index (IPNI) (2012). Published on the Internet  
546 <http://www.ipni.org> [accessed March and May 2017]  
547  
548 Irwin, J.A.G., Sewell, J.C., Woodfield, D.R., & Bingham, E.T. (2016). Restructuring lucerne  
549 (*Medicago sativa*) through introgression of the *Medicago arborea* genome. *Agricultural Science*,  
550 28 (1), 40-46.  
551  
552 Jackson, M.T., & Ford-Lloyd, B.V. (1990). Plant genetic resources - a perspective (p.1-17). In:  
553 M.T. Jackson, B.V. Ford-Lloyd, & M.L. Parry (Eds.), *Climatic Change and Plant Genetic*  
554 *Resources*. London: Belhaven Press.  
555

- 556 Kantar, M.B., Tyl, C. E., Dorn, K.M., Zhang, X., Jungers, J.M., Kaser, J.M., Schendel, R.R.,  
557 Eckberg, J.O., Runck, B.C., Bunzel, M., Jordan, N.R., Stupar, R.M., Marks, M.D., Anderson,  
558 J.A., Johnson, G.A., Sheaffer, C.C., Schoenfuss, T.C., Ismail, B., Heimpel, G.E., & Wyse, D.L.  
559 (2016). *Annual Reviews of Plant Biology*, 67, 703-29. [https://doi:10.1146/annurev-arplant-](https://doi:10.1146/annurev-arplant-043015-112311)  
560 043015-112311.
- 561
- 562 Lewis, G., Schrire, B., & Lock, M. (2005). *Legumes of the World*. Richmond: Kew Publishing.
- 563
- 564 Mann, C. (1997). Reseeding the Green Revolution. *Science*, 277 (5329), 1038-1043.
- 565
- 566 Meyer, R.S., DuVal, A.E., & Jensen, H.R. (2012). Patterns and processes in crop domestication:  
567 an historical review and quantitative analysis of 203 global food crops. *New Phytologist Trust*,  
568 196 (1), 29-48. [https://doi: 10.1111/j.1469-8137.2012.04253.x](https://doi:10.1111/j.1469-8137.2012.04253.x).
- 569
- 570 Millennium Ecosystem Assessment (2005). *Ecosystems and Human Well-being: Biodiversity*  
571 *Synthesis*. World Resources Institute, Washington, DC.
- 572
- 573 National Research Council (1979). *Tropical legumes: Resources for the future*. Washington:  
574 National Academy of Sciences.
- 575
- 576 Pimentel, D., Cerasale, D., Stanley, R.C., Perlman, R., Newman, E.M., Brent, L.C., Mullan, A.,  
577 & Chang, D.T.-I. (2012). Annual vs. perennial grain production. *Agriculture, Ecosystems and*  
578 *Environment*, 161, 1-9. <http://dx.doi.org/10.1016/j.agee.2012.05.025>.
- 579
- 580 Pretty, J., Toulmin, C., & Williams, S. (2011). Sustainable Intensification in African Agriculture.  
581 *International Journal of Agricultural Sustainability*, 9 (1), 5-24.  
582 <https://doi.org/10.3763/ijas.2010.0583>.
- 583
- 584 Roskov, Y., Bisby, F., Zarucchi, J., Schrire, B., & White, R. (Eds.) (2005). ILDIS World  
585 Database of Legumes: draft checklist, version 10 (November 2005). Mini CD-ROM; ILDIS:  
586 Reading, UK. ISBN 070491-2481.

587  
588 Roskov, Y., Zarucchi, J., Novoselova, M., & Bisby, F.(†) (Eds) (2017a). ILDIS World Database  
589 of Legumes (version 12, May 2014). In: Species 2000 & ITIS Catalogue of Life, 2017 Annual  
590 Checklist (Roskov, Y., Abucay, L., Orrell, T., Nicolson, D., Bailly, N., Kirk, P.M., Bourgoin, T.,  
591 DeWalt, R.E., Decock, W., De Wever, A., Nieukerken, E. van, Zarucchi, J., Penev, L., eds.).  
592 Digital resource at [www.catalogueoflife.org/annual-checklist/2017](http://www.catalogueoflife.org/annual-checklist/2017). Species 2000: Naturalis,  
593 Leiden, the Netherlands. ISSN 2405-884X.  
594  
595 Roskov, Y., Zarucchi, J., Novoselova, M., & Bisby, F.(†) (Eds) (2017b). ILDIS World Database  
596 of Legumes (version 12, May 2014). In: Y. Roskov et al. (Eds.) (2017). Species 2000 & ITIS  
597 Catalogue of Life, 29th November 2017. Digital resource at [www.catalogueoflife.org/col](http://www.catalogueoflife.org/col).  
598 Species 2000: Naturalis, Leiden, the Netherlands. ISSN 2405-8858.  
599  
600 Ryan, M.R., Crews, T.E., Culman, S.W., Dehaan, L.R., Hayes, R.C., Jungers, J.M., & Bakker,  
601 M.G. (2018). Managing for Multifunctionality in Perennial Grain Crops. *Bioscience*, 68 (4), 294  
602 - 304. <https://doi.org/10.1093/biosci/biy014>.  
603  
604 Schlautman, B., Barriball, S., Ciotir, C, Herron, S., & Miller, A.J. (2018) Perennial Grain  
605 Legume Domestication Phase I: Criteria for Candidate Species Selection. *Sustainability*, 10 (3),  
606 730-753. <https://doi:10.3390/su10030730>.  
607  
608 Smartt, J. (1990). *Grain legumes: evolution and genetic resources*. Cambridge: Cambridge  
609 University Press.  
610  
611 Smartt, J., & Simmonds, N.W. (Eds.) (1995). *Evolution of Crop Plants, 2nd Edition*. Singapore:  
612 Longman Publishers.  
613  
614 Smýkal, P., Nelson, M.N., Berger, J.D., & von Wettberg, E.J.B. (2018). The impact of genetic  
615 changes during crop domestication. *Agronomy*, 8 (26), 119-141.  
616 <https://doi:10.3390/agronomy8030026>.  
617

- 618 Tang, Q., Rong, T., Song, Y., Yang, J., Pan, G., Li, W., Huang, Y., & Cao, M. (2005).  
619 Introgression of Perennial Teosinte Genome into Maize and Identification of Genomic In Situ  
620 Hybridization and Microsatellite Markers. *Crop Science*, 45, 717-721.  
621
- 622 Tittone, P. (2014). Ecological intensification of agriculture — sustainable by nature. *Current*  
623 *Opinion in Environmental Sustainability*, 8, 53-61. <https://doi.org/10.1016/j.cosust.2014.08.006>.  
624
- 625 Van Tassel, D., DeHaan, L.R., & Cox, T.S. (2010). Missing domesticated plant forms: can  
626 artificial selection fill the gap? *Evolutionary Applications* 3 (5-6), 434-452.  
627 <https://doi:10.1111/j.1752-4571.2010.00132.x>.  
628
- 629 Van Tassel, D.L., & DeHaan, L.R. (2013). Wild Plants to the Rescue. A reprint from the  
630 *American Scientist*, 1, 218-227. Available at: [https://www.americanscientist.org/article/wild-](https://www.americanscientist.org/article/wild-plants-to-the-rescue)  
631 [plants-to-the-rescue](https://www.americanscientist.org/article/wild-plants-to-the-rescue).  
632
- 633 Van Tassel, D.L., Albrecht, K.A., Bever, J.D., Boe, A.A., Brandvain, Y., Crews, T.E.,  
634 Gansberger, M., Gerstberger, P., González-Paleo, L., Hulke, B. S., Kane, N. C., Johnson, P. J.,  
635 Pestsova, E.G., Picasso Risso, V.D., Prasifka, J.R., Ravetta, D.A., Schlautman, B., Sheaffer, C.C.,  
636 Smith, K.P., Speranza, P. R., Turner, K. M., Vilela, A.E., von Gehren, P., & Wever, C. (2017).  
637 Accelerating *Silphium* Domestication: An Opportunity to Develop New Crop Ideotypes and  
638 Breeding Strategies Informed by Multiple Disciplines. *Crop Science* 57, 1274-1284. [https://doi:](https://doi:10.2135/cropsci2016.10.0834)  
639 [10.2135/cropsci2016.10.0834](https://doi:10.2135/cropsci2016.10.0834).  
640
- 641 Vilela, A., González-Paleo, L., Turner, K., Peterson, K., Ravetta, D., Crews, T., & Van Tassel,  
642 D.L. (2018). Progress and Bottlenecks in the Early Domestication of the Perennial Oilseed  
643 *Silphium integrifolium*, a Sunflower Substitute. *Sustainability*, 10 (3), 638-661.  
644 <https://doi:10.3390/su10030638>.  
645
- 646 Widenius, M., & Axmark, D. (2002). *MySQL Reference Manual* (1st ed.). Paul DuBois (Ed.).  
647 O'Reilly & Associates, Inc., Sebastopol, CA, USA. ISBN:0596002653  
648



- 649 Williams, M.C., & Gómez-Sosa, E. (1986). Toxic nitro compounds in species of *Astragalus*  
650 (Fabaceae) in Argentina. *Journal of Range Management*, 39 (4), 341-344. [https://doi:](https://doi.org/10.2307/3899776)  
651 10.2307/3899776.
- 652
- 653 Wink, M., Meisner, C., & Witte, L. (1995) Patterns of quinolizidine alkaloids in 56 species of the  
654 genus *Lupinus*. *Phytochemistry*, 38, 139-153. [https://doi.org/10.1016/0031-9422\(95\)91890-D](https://doi.org/10.1016/0031-9422(95)91890-D).
- 655
- 656 Zhang, Y., Li, Y., Jiang, L., Tian, C., Li, J., & Xiao, Z. (2011). Potential of Perennial Crop on  
657 Environmental Sustainability of Agriculture. *Procedia Environmental Sciences*, 10 (Part B),  
658 1141-1147. <https://doi.org/10.1016/j.proenv.2011.09.182>.

659

660

## 661 **List of tables**

662

663 Table 1. Perennial grain crops under development.

664

665 Table 2. Tropicos Perennial Agriculture Project Global Inventory (PAPGI) Search builder. For  
666 each general description category, specific trait types and descriptors were identified. In PAPGI,  
667 users can search legumes by trait.

668

669 Table 3. Summary of the number and taxon names and species names extracted from the  
670 International Legume Database and Information Service (ILDIS) organized according to lifespan  
671 and habit combination traits. Each row is exclusive of the others, such that only taxa with that  
672 exact combination of traits were counted for the row (e.g., only perennial and herbaceous and  
673 shrubby taxa in the first row). That is, the taxa in the first row are perennials which may be found  
674 in both a herbaceous and shrubby form. Perennial/annual taxa are defined as perennials that can  
675 grow as annuals in some environments. Herbaceous/shrubby taxa are defined as herbs that could  
676 be shrubby in some environments. Bold font denotes categories that were retained from ILDIS,  
677 matched in Tropicos, and imported in PAPGI (e.g. perennial and herbaceous, or perennial/annual  
678 herbaceous, or perennial herbaceous/shrubby).

679

680

## 681 **List of figures**

682

683 Figure 1. Conceptual framework for building a botanical foundation for perennial polyculture  
684 agriculture. Flow chart of data for PAPGI construction and use.

685

686 Figure 2. Pie-chart representation of the proportion of perennial/annual and woody/herbaceous  
687 Fabaceae species extracted from ILDIS based on Table 3. Lifespan and growth habit categories  
688 with less than 23 species were grouped together as others (0.24%) due to their small proportions  
689 within the Fabaceae family. The legend shows different colors based on lifespan and habit trait  
690 combinations; numbers in parentheses represent number of species for each category.

691

## 692 **Supporting Information**

693

694 Table S1. Some perennial, herbaceous species cultivated for fruits and seeds, below-ground  
695 structures, or vegetative components; many of these are planted as annual crops.

696

697 Table S2. Legume genera with domesticated species cultivated mainly for food, forage, and other  
698 uses. Crop species may be herbaceous annual, herbaceous perennial, or woody perennial.

699 Superscripts for scientific names of crop species denote the following categories \*= perennial  
700 herbaceous species cultivated as annual, +=perennial herbaceous species, grown for multiple

701 years, and #=woody perennial; annual species have no marking symbol. Total number of species  
702 is completed from ILDIS (Roskov et al., 2005), and Lewis, Schrire, & Lock, 2005. The

703 annual/perennial number of species is completed from ILDIS, Kole (Ed.), 2011, and PAPGI  
704 (Ciotir et al., 2016). All references are abbreviated and listed in the footnote.

705

706 Table S3. Existing databases that focus on crops and their wild relatives, wild plant diversity,  
707 taxonomy, general plant traits, and digitized specimens. Major biodiversity information portals to  
708 which Tropicos is connected are indicated by \*.

709

710 Methods: Appendix S1. Document with detailed description of eight ILDIS legume data files,  
711 and the code of data extraction.

712

713 Table S4. Acquired ILDIS data consist of eight csv files; each file is listed by name, content, and  
714 description.

715

716 Table S5. Raw ILDIS data extracted using MySQL, Visual FoxPro, and Excel software.

717 Headings include unique ID number, lifespan (annual, perennial), growth habit (herb, shrub, and  
718 tree), genus name, genus name author, species name, species name author, subspecies/variety  
719 name, and subspecies/variety name author.

720

721 Table S6. Ethnobotanical data for 314 perennial herbaceous/shrubby species of the Fabaceae  
722 family extracted from PAPGI.

723

724 Table S7. Toxicological data for 238 perennial herbaceous/shrubby species of the Fabaceae  
725 family.

726

727 Figure S1. Conceptual workflow chart for ILDIS database extraction and PAPGI construction.

728

729 Figure S2. Workflow executed for ILDIS database extraction. The raw data has been imported  
730 into Microsoft Excel and MySQL, executing MySQL queries and Visual FoxPro scripts to match  
731 each lifespan and habit trait to its specific ID and taxon name.

**Table 1.** Some perennial grain crops currently under development.

| <b>Crop common name</b>            | <b>Scientific name</b>                                                                      | <b>Family</b> | <b>Reference</b>                             |
|------------------------------------|---------------------------------------------------------------------------------------------|---------------|----------------------------------------------|
| Perennial alfalfa hybrid           | <i>Medicago sativa</i> x <i>M. arborea</i> (L.)                                             | Fabaceae      | Bingham et al., 2005; Irwin et al., 2016     |
| Perennial buckwheat                | <i>Fagopyrum cymosum</i> (Trevir.) Meisn.                                                   | Polygonaceae  | Chen et al., 2018                            |
| Intermediate wheatgrass or Kernza® | <i>Thinopyrum intermedium</i> (Host) Barkworth and D.R. Dewey                               | Poaceae       | DeHaan et al., 2018                          |
| Perennial maize                    | ( <i>Zea diploperennis</i> (Iltis, Doebley & R. Guzman))                                    | Poaceae       | Kantar et al., 2016                          |
| Perennial maize hybrid             | <i>Zea mays</i> (L.) x <i>Zea diploperennis</i>                                             | Poaceae       | Tang et al., 2005                            |
| Perennial rice                     | <i>Oryza sativa</i> × <i>Oryza longistaminata</i>                                           | Poaceae       | Huang et al., 2018                           |
| Rosinweed                          | <i>Silphium integrifolium</i> (Michx.)                                                      | Asteraceae    | Van Tassel et al., 2017; Vilela et al., 2018 |
| Perennial sorghum                  | <i>Sorghum bicolor</i> (L.) Moench x <i>S. halepense</i> (L.) Pers)                         | Poaceae       | Cox et al., 2018                             |
| Perennial wheat                    | <i>Triticum aestivum</i> L. × <i>Thinopyrum intermedium</i> (Host) Barkworth and D.R. Dewey | Poaceae       | Hayes et al., 2018                           |

**Table 2.** Perennial Agriculture Project Global Inventory (PAPGI) Search builder housed within the botanical database TROPICOS. For each general description category, specific trait types and descriptors were identified. In PAPGI, users can search legumes by trait.

| <b>General description category</b> | <b>Trait type</b>               | <b>Specific descriptor(s) with taxonomic and breeding ability</b>                                                                                                                                                                                                                                                        |
|-------------------------------------|---------------------------------|--------------------------------------------------------------------------------------------------------------------------------------------------------------------------------------------------------------------------------------------------------------------------------------------------------------------------|
| <b>Taxonomy and classification</b>  | Family, Genus, Species          | Text box                                                                                                                                                                                                                                                                                                                 |
| <b>General growth descriptors</b>   | Lifespan                        | Annual, Biennial, Perennial, Unknown                                                                                                                                                                                                                                                                                     |
|                                     | Life form                       | Herbaceous, Shrub, Subshrub, Tree, Vine                                                                                                                                                                                                                                                                                  |
|                                     | Plant-human relationship        | Cultivated, Noxious weed, Wild, Unknown                                                                                                                                                                                                                                                                                  |
|                                     | Photoperiodism                  | Day length neutral, Day length sensitive, Unknown                                                                                                                                                                                                                                                                        |
|                                     | Plant habit                     | Climbing, Cushion, Erect, Graminoid, Prostrate, Scrambling, Sprawling, Turf, Tussock, Twining, Unknown                                                                                                                                                                                                                   |
|                                     | Stem type                       | Solitary, Multiple                                                                                                                                                                                                                                                                                                       |
|                                     | Vernalisation                   | No, Yes, Unknown                                                                                                                                                                                                                                                                                                         |
| <b>Ecology</b>                      | Biogeographic realm             | Australasian, Antarctic, Afrotropical, Indo-Malayan, Nearctic, Neotropical, Oceanic, Palearctic                                                                                                                                                                                                                          |
|                                     | Climatic zone                   | Boreal, Mediterranean, Montane, Subtropical, Temperate, Tropical, Tundra                                                                                                                                                                                                                                                 |
|                                     | Conservation status             | Critically Endangered, Data Deficient, Endangered, Extinct, Extinct in the Wild, Least Concern, Near Threatened, Not Evaluated, Vulnerable                                                                                                                                                                               |
|                                     | Elevation                       | Below sea level, 0 > 4500 m, Unknown                                                                                                                                                                                                                                                                                     |
|                                     | Mycorrhizal associations        | Yes, No, Unknown                                                                                                                                                                                                                                                                                                         |
|                                     | Nitrogen fixation               | Yes, No, Unknown                                                                                                                                                                                                                                                                                                         |
|                                     | Seed dispersal in nature        | Bird, Insect, Mammal, Water                                                                                                                                                                                                                                                                                              |
|                                     | Tolerance(s)                    | Drought, Fire, Wind, Frost, Nutrient poor soil, Pathogens, Pests, Salinity, Shade                                                                                                                                                                                                                                        |
|                                     | Vegetation type                 | Anthropogenic, Coastlines/beaches/sand, Coniferous forest, Desert, Disturbed grassland, Dry broadleaf forest, Grassland, Humid broadleaf forest, Mangrove forest, Meadow, Mixed forests, Mountainsides/dry slopes, Roadsides, Savanna, Shrubland, Steppe, Xeric shrublands Swamp/marsh, Tundra, Volcanic soil vegetation |
| <b>Reproductive biology</b>         | Asexual reproduction (apomixis) | Agamospermy, Apogamy, Apospory, Parthenogenesis, Unknown                                                                                                                                                                                                                                                                 |
|                                     | Sexual reproduction             | Outcrossing, Selfing (cleistogamous), Unknown                                                                                                                                                                                                                                                                            |
|                                     | Vegetative reproduction         | Bulbs, Cuttings, Rhizomes, Stolons, Tubers, Unknown                                                                                                                                                                                                                                                                      |

|                     |                                                     |                                                                                                                                                                                                       |
|---------------------|-----------------------------------------------------|-------------------------------------------------------------------------------------------------------------------------------------------------------------------------------------------------------|
|                     | Floral and plant sex                                | Androdioecious, Androgynomonocious, Andromonoecious, Dioecious, Gynodioecious, Gynomonocious, Hermaphroditic/bisexual flowers, Polygamodioecious, Polygamomonocious, Monoecious, Unknown              |
|                     | Unisexual floral distribution                       | Axillary, Caulinary, Terminal, Unknown                                                                                                                                                                |
|                     | Inflorescence type                                  | Capitulum, Catkin, Corymb, Cyme, Panicle, Pseudoraceme, Raceme, Solitary flowers, Spadix, Spike, Umbel, Unknown                                                                                       |
|                     | Inflorescence position                              | Axillary, Terminal, Unknown                                                                                                                                                                           |
|                     | Pollination                                         | Birds, Insects, Mammals, Wind, Unknown                                                                                                                                                                |
|                     | Fruit dehiscence                                    | Dehiscent, Indehiscent, Partially dehiscent, Unknown                                                                                                                                                  |
|                     | Fruit persistence                                   | Persistent, Shattering, Unknown                                                                                                                                                                       |
|                     | Details: Fruit shape and size                       | Open response                                                                                                                                                                                         |
|                     | Seeds per fruit                                     | 1, 2-5, 6-10, >10                                                                                                                                                                                     |
|                     | Seed color                                          | Open response                                                                                                                                                                                         |
|                     | Seed size                                           | Open response                                                                                                                                                                                         |
|                     | Seed description                                    | Open response                                                                                                                                                                                         |
|                     | Germination requirements                            | Moisture treatment, Long-term storage, Nicking, None, Scarification, Short-term storage                                                                                                               |
|                     | Seed dormancy breaking                              | Chemical scarification, Hormone treatment, Long-term storage, Mechanical scarification, Other, Short-term storage, Stratification, Temperature cycling                                                |
|                     | Details: Seed dormancy breaking                     | Open response                                                                                                                                                                                         |
|                     | Seed storage behavior and longevity                 | Orthodox, Recalcitrant, Indefinite, Short, Unknown                                                                                                                                                    |
|                     | Seedling emergence                                  | Delicate/slow, Vigorous/rapid                                                                                                                                                                         |
|                     | Details: Seed viability                             | Open response                                                                                                                                                                                         |
| <b>Genetics</b>     | Analyses of genetic variation                       | AFLP, Chloroplast sequence data, Microsatellites, Mitochondrial sequence data, Nuclear sequence data, Plastid sequence data, SNP analysis via reduced representation sequencing (GBS, Rad-seq, other) |
|                     | Genome sequence                                     | Yes, No                                                                                                                                                                                               |
|                     | Assessment of genetic basis of phenotypic variation | GWAS study, QTL analysis, Transformation                                                                                                                                                              |
|                     | Ploidy                                              | 2x, 3x, 4x, 6x, 7x, 8x, 10x, Other, Unknown                                                                                                                                                           |
|                     | Details: Genetics                                   | Open response                                                                                                                                                                                         |
| <b>Economic use</b> | Domestic animal edible                              | Fodder, Forage, Silage                                                                                                                                                                                |

|                 |                   |                                                                                                                                                    |
|-----------------|-------------------|----------------------------------------------------------------------------------------------------------------------------------------------------|
|                 | Human edible      | Below-ground structures, Flowers, Fruits, Leaves, Seeds, Stems                                                                                     |
|                 | Other uses        | Bioenergy, Cultural or religious significance, Fiber, Gums/resins, Honey production, Latex/rubber, Waxes, Medicinal/psychoactive, Other properties |
| <b>Toxicity</b> | Toxicity          | Animal, Human, Predicted                                                                                                                           |
|                 | Toxic parts       | Flowers, Forage with seed, Leaves, Pods, Roots, Seeds, Silage, Stems                                                                               |
|                 | Details: Toxicity | Open response                                                                                                                                      |



**Table 4.** Summary of taxon names and species names extracted from the International Legume Database and Information Service (ILDIS) organized according to lifespan and habit combination traits. Each row is exclusive of the others, such that only taxa with that exact combination of traits were counted for the row (e.g., only perennial and herbaceous and shrubby taxa in the first row). That is, the taxa in the first row are perennials which may be found in both a herbaceous and shrubby form. Bold font denotes categories that were retained from ILDIS, matched in Tropicos, and imported in PAPGI (e.g. perennial and herbaceous, or perennial/annual herbaceous, or perennial herbaceous/shrubby).

| <b>Lifespan</b>                  | <b>Habit</b>      | <b>#Taxa</b> | <b>#Species</b> |
|----------------------------------|-------------------|--------------|-----------------|
| <b>Perennial</b>                 | <b>Herb/Shrub</b> | <b>1,834</b> | <b>1,482</b>    |
| <b>Perennial</b>                 | <b>Herb</b>       | <b>5,933</b> | <b>4,817</b>    |
| Perennial                        | Tree              | 2,904        | 2,439           |
| Perennial                        | Shrub/Tree        | 1,619        | 1,300           |
| Perennial                        | Shrub             | 5,222        | 4,230           |
| Perennial                        | Herb/Shrub/Tree   | 25           | 23              |
| Perennial                        | Herb/Tree         | 3            | 3               |
| <b>Annual, Perennial</b>         | <b>Herb/Shrub</b> | <b>159</b>   | <b>117</b>      |
| <b>Annual, Perennial</b>         | <b>Herb</b>       | <b>311</b>   | <b>228</b>      |
| Annual, Perennial                | Tree              | 1            | 1               |
| Annual, Perennial                | Shrub/Tree        | 3            | 2               |
| Annual, Perennial                | Shrub             | 4            | 3               |
| Annual Biennial                  | Herb/Shrub/Tree   | 2            | 1               |
| Annual                           | Herb/Shrub        | 5            | 4               |
| Annual                           | Herb/Shrub/Tree   | 1            | 1               |
| Annual                           | Shrub             | 1            | 1               |
| Annual                           | Herb              | 1,667        | 1,311           |
| Taxon names with complete traits |                   | 19,694       | 15,963          |
| Taxon names with missing traits  |                   | 5,311        | 3,941           |
| Total number of taxon names      |                   | 25,005       | 19,904          |

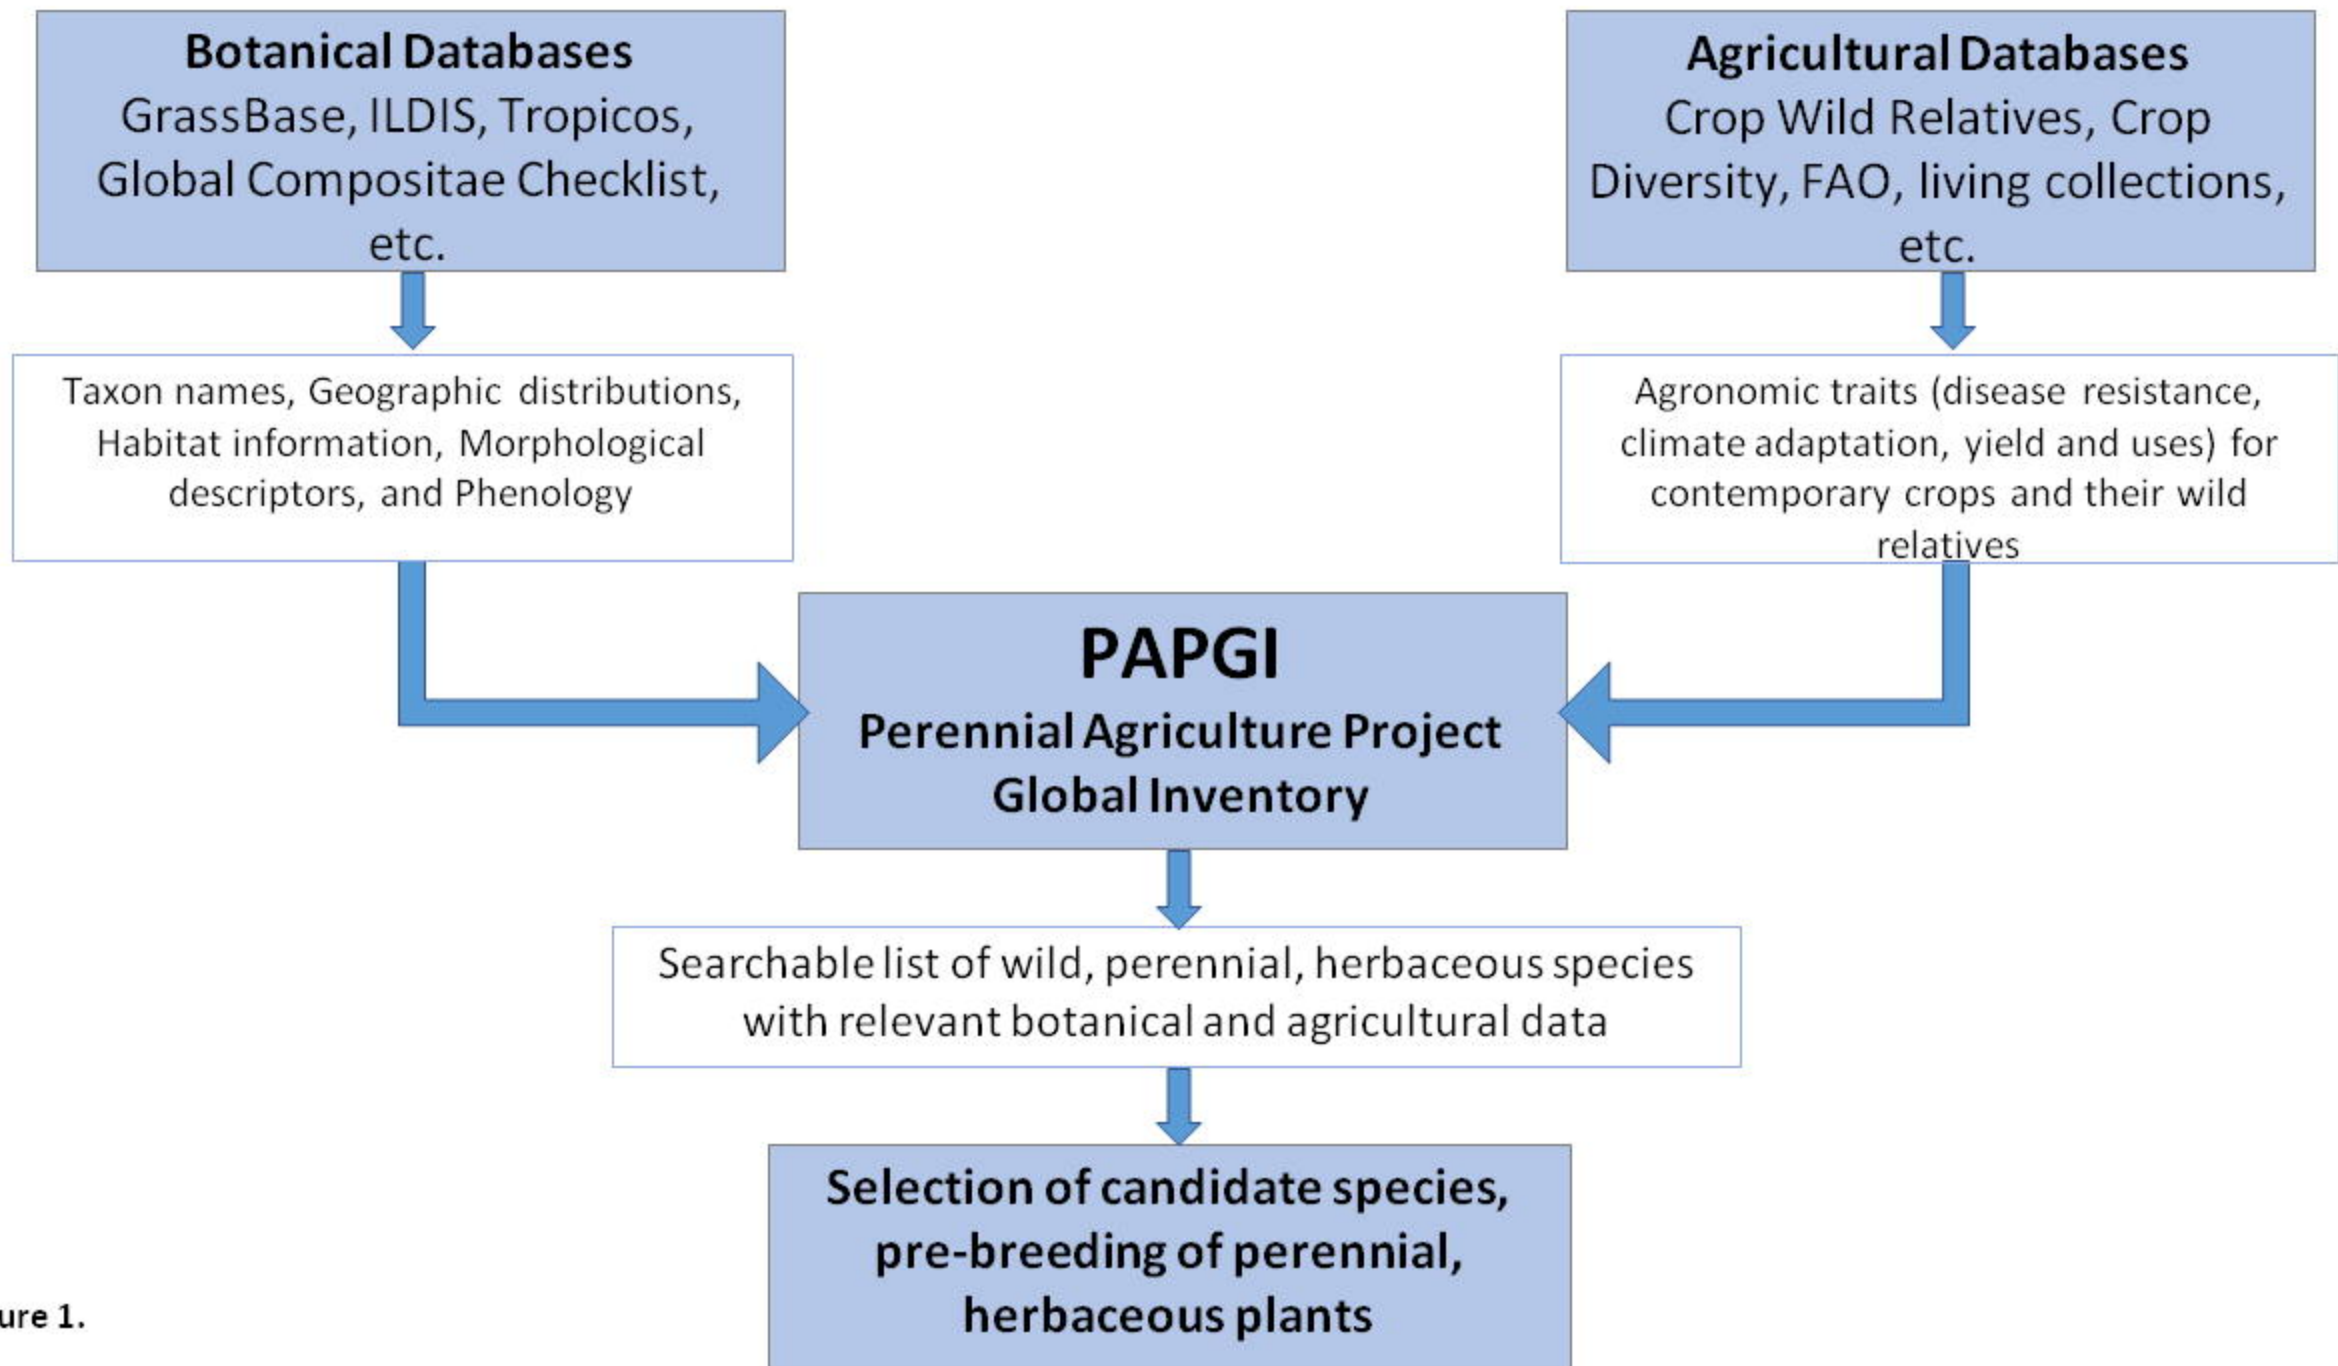

Figure 1.

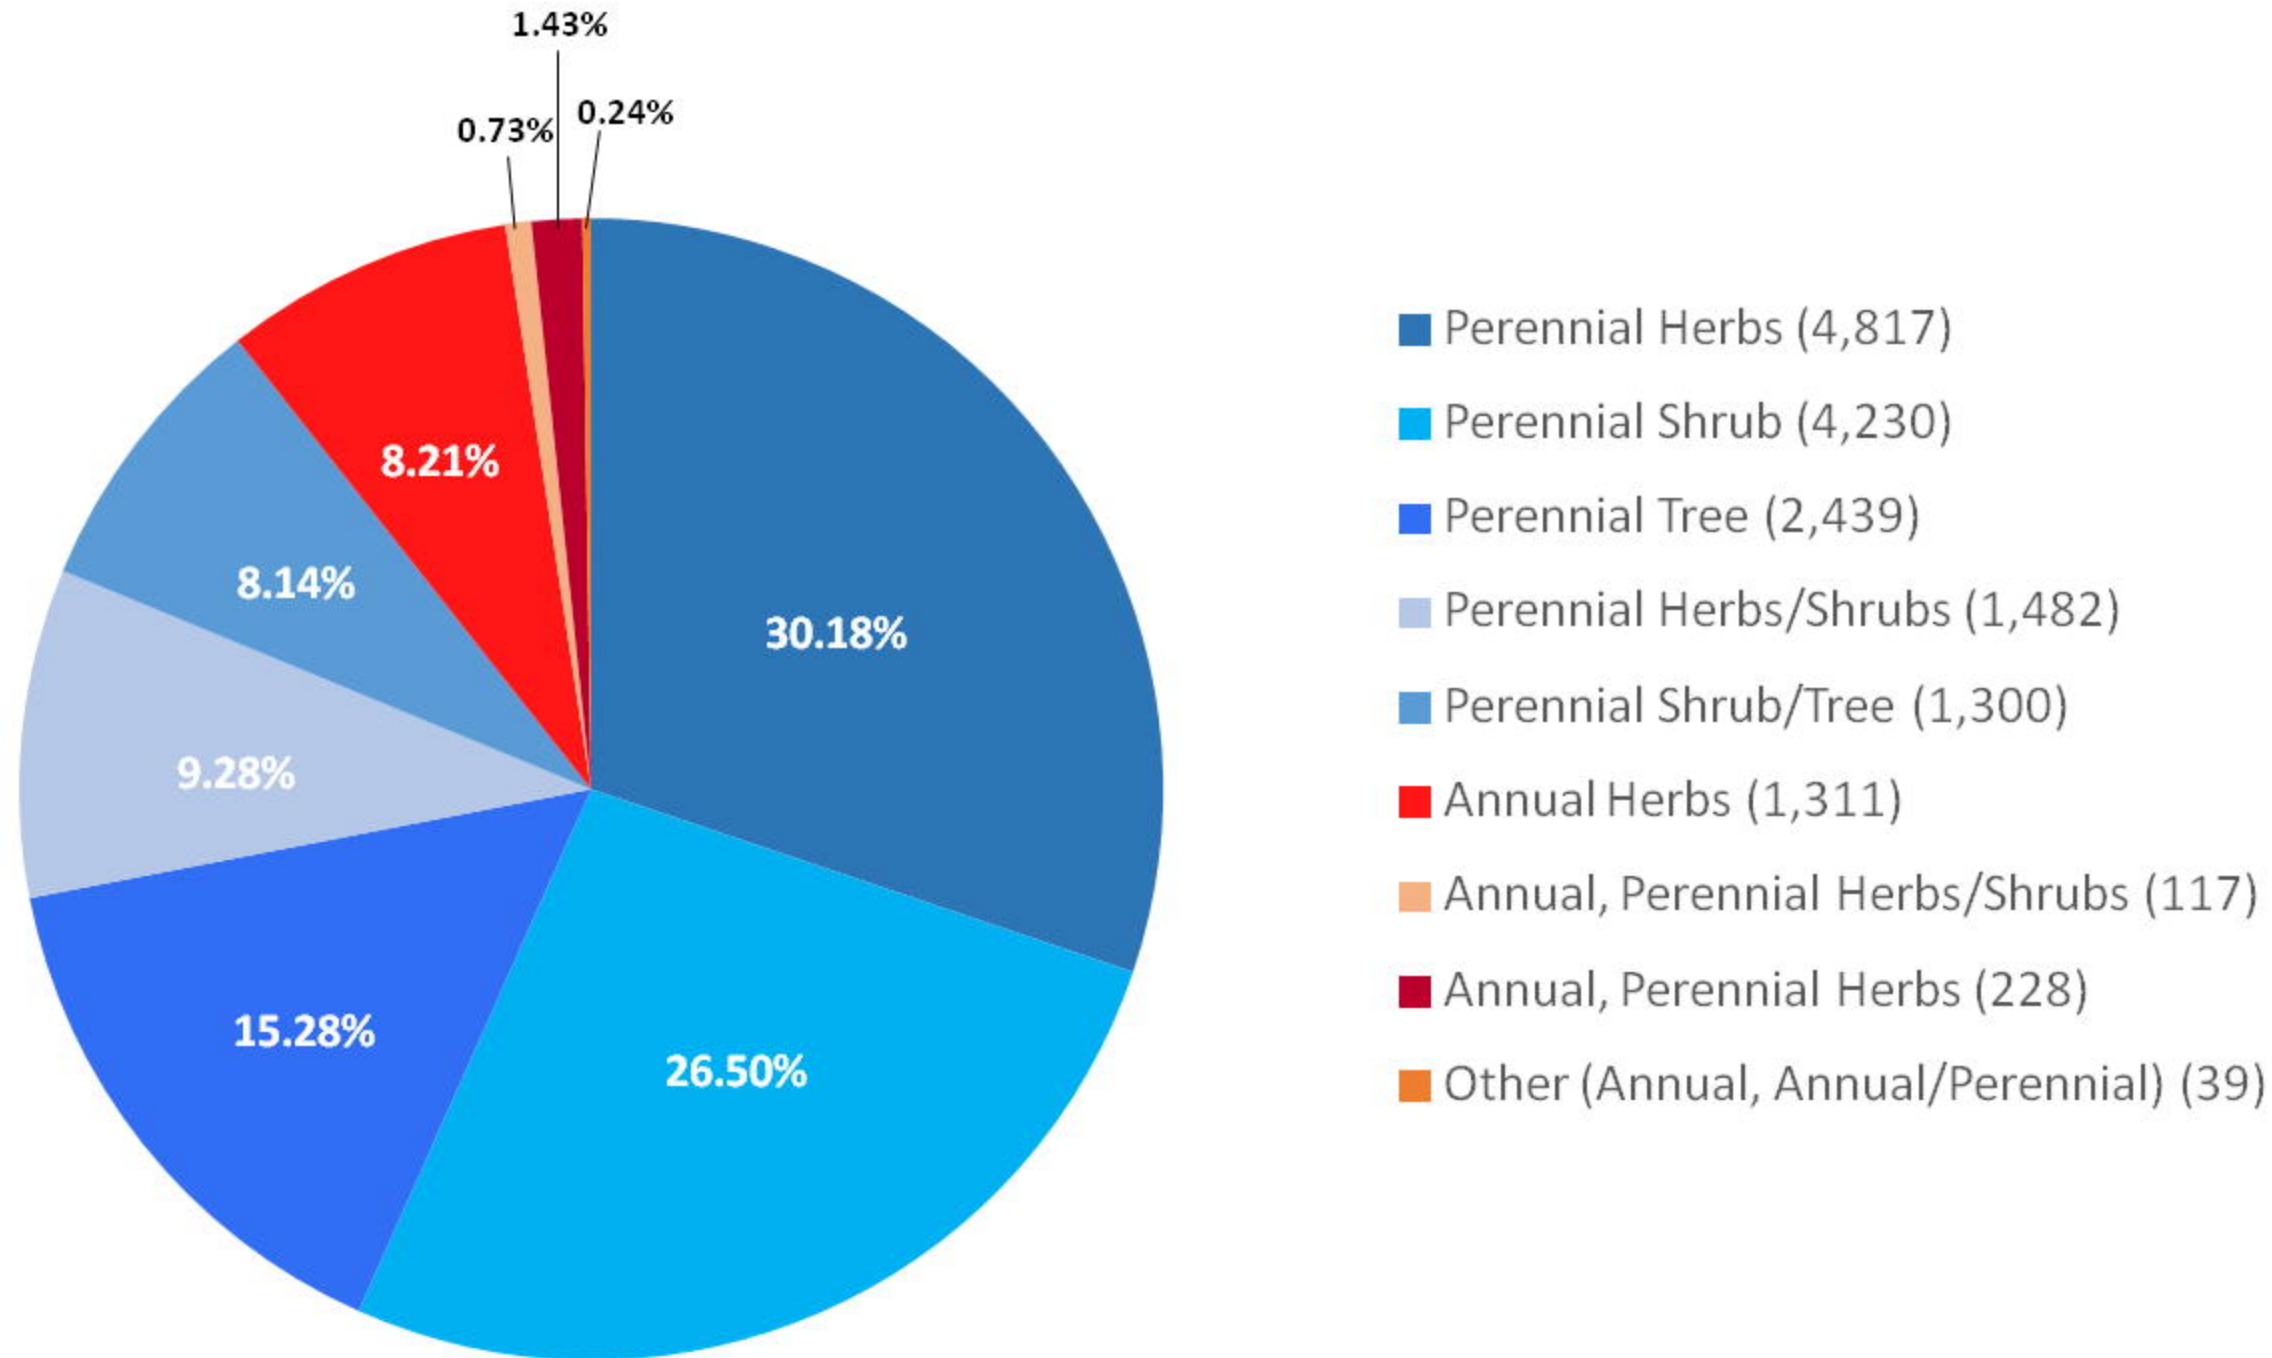

Figure 2.
